# Supplementary material for: Genome-wide mapping reveals R-loops associated with centromeric repeats in maize
Source: PubMed Central journal article supplement — Genome Res. 2021 Aug;31(8):1409–18. doi: 10.1101/gr.275270.121 (PMC8327920; doi:10.1101/gr.275270.121), 2021-08
Supplement: supp_gr.275270.121_Supplemental_Fig_S1.pdf [file supp_gr.275270.121_Supplemental_Fig_S1.pdf]

**A**

| Samples   | Biological replicates | Clean read  | Mappable read | Mappable rate | Unique mappable read | Unique mappable rate |
|-----------|-----------------------|-------------|---------------|---------------|----------------------|----------------------|
| DRIP rep1 | 1                     | 190,147,266 | 178,975,199   | 94.12%        | 112,051,878          | 58.93%               |
| DRIP rep2 | 2                     | 200,289,952 | 194,112,405   | 96.92%        | 118,957,771          | 59.39%               |
| RH rep1   | 1                     | 98,759,725  | 90,841,055    | 91.98%        | 63,119,172           | 63.77%               |
| RH rep2   | 2                     | 69,749,975  | 64,713,205    | 92.78%        | 44,681,101           | 64.06%               |
| Input     | 1                     | 177,644,909 | 166,668,099   | 93.82%        | 95,801,073           | 53.93%               |

**B**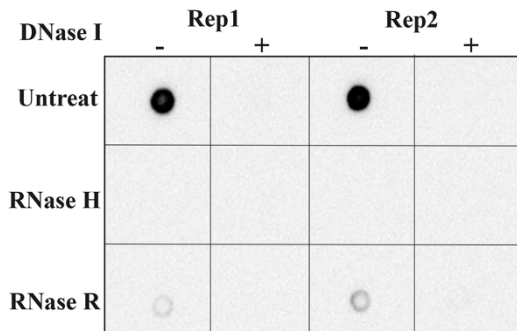**C**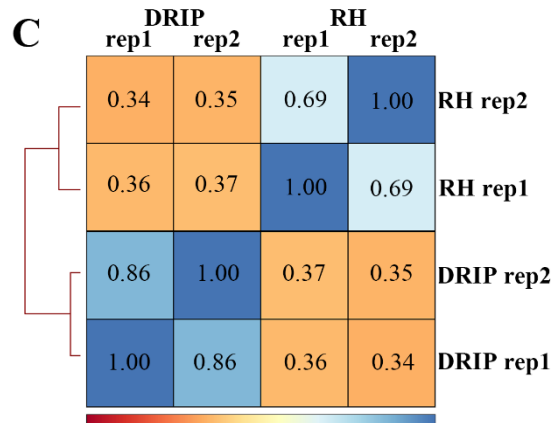**D**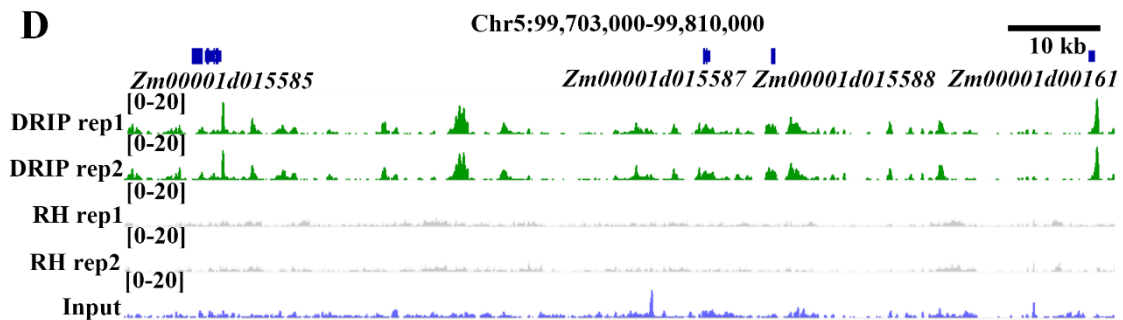**Supplemental Fig S1. Basic information of the ssDRIP-seq data.**

(A) Basic information of sequencing data of two replications (DRIP rep1, 2), two negative controls (RNase H rep1, 2) and one input. The input data was derived from the DNA after restriction endonuclease digestion without anti-S9.6 antibody incubation. After data processing, we obtained more than 100 million read pairs that uniquely mapped to the maize B73\_RefGen\_v4, representing about 15-fold whole-genome coverage for each sample, except for the negative RNase H controls. (B) Dot blotting assay. Genomic DNA (50 ng) treated with or without RNase H (which degrades RNA in DNA: RNA hybrids) and RNase R (exonuclease that degrades linear RNA, but not circular RNA) was loaded onto an an Hybond<sup>TM</sup>-N+ membrane before it was probed with anti-S9.6 antibody (1:10,000 dilution). Maize genomic DNA incubated with the anti-S9.6 antibody exhibited

strong R-loop signals. Pre-treatment with RNase H ablated the signal, confirming the signals are R-loop-specific. Pre-treatment with RNase R ablated the most of signals, indicating that circRNAs may also mediate R-loops formation in maize. (C) and (D) The correlation between two independent biological replicates. (C) Spearman's correlation of read densities (the bin size as 10 bp) was calculated between two independent biological replicates using the deepTools software. (D) Snapshot of the ssDRIP-seq data between two biological replicates.
