# Supplementary material for: Genome-wide mapping reveals R-loops associated with centromeric repeats in maize
Source: PubMed Central journal article supplement — Genome Res. 2021 Aug;31(8):1409–18. doi: 10.1101/gr.275270.121 (PMC8327920; doi:10.1101/gr.275270.121), 2021-08
Supplement: supp_gr.275270.121_Supplemental_Fig_S2.pdf [file supp_gr.275270.121_Supplemental_Fig_S2.pdf]

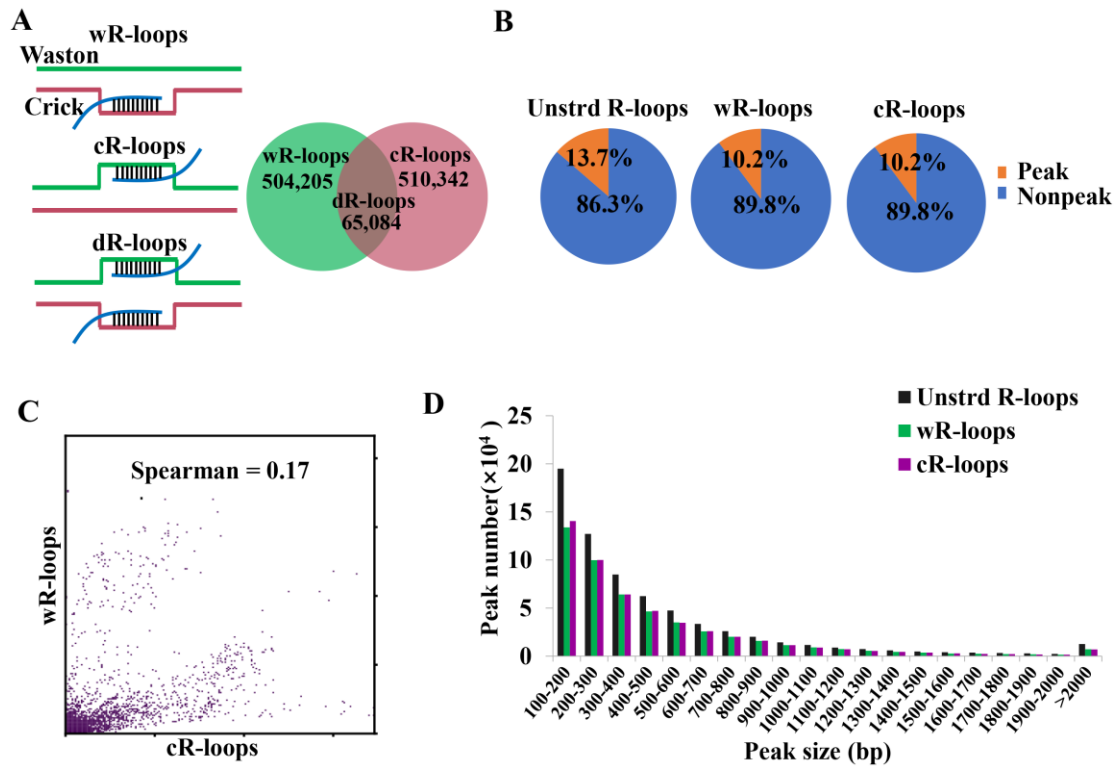

**Supplemental Fig S2. Statistics of the wR-loops and cR-loops.**

(A) Illustration of three types of R-loops: wR-loops represented the R-loop peaks found in the Crick strand; and cR-loops represent the R-loop peaks found in the Waston strand; dR-loops represented R-loops with a wR-loop and cR-loop in the same genomic region. Peaks number of the wR-loops, cR-loops and dR-loops (right). (B) The percentages of unstranded R-loop (left), wR-loop (middle) and cR-loop (right) peak regions in the genome. (C) Spearman's correlation between wR-loops and cR-loops (the bin size as 10- bp). (D) Peak size distribution of unstranded R-loops (black), wR-loops (green) and cR-loops (purple).
