# Supplementary material for: Genome-wide mapping reveals R-loops associated with centromeric repeats in maize
Source: PubMed Central journal article supplement — Genome Res. 2021 Aug;31(8):1409–18. doi: 10.1101/gr.275270.121 (PMC8327920; doi:10.1101/gr.275270.121), 2021-08
Supplement: supp_gr.275270.121_Supplemental_Fig_S4.pdf [file supp_gr.275270.121_Supplemental_Fig_S4.pdf]

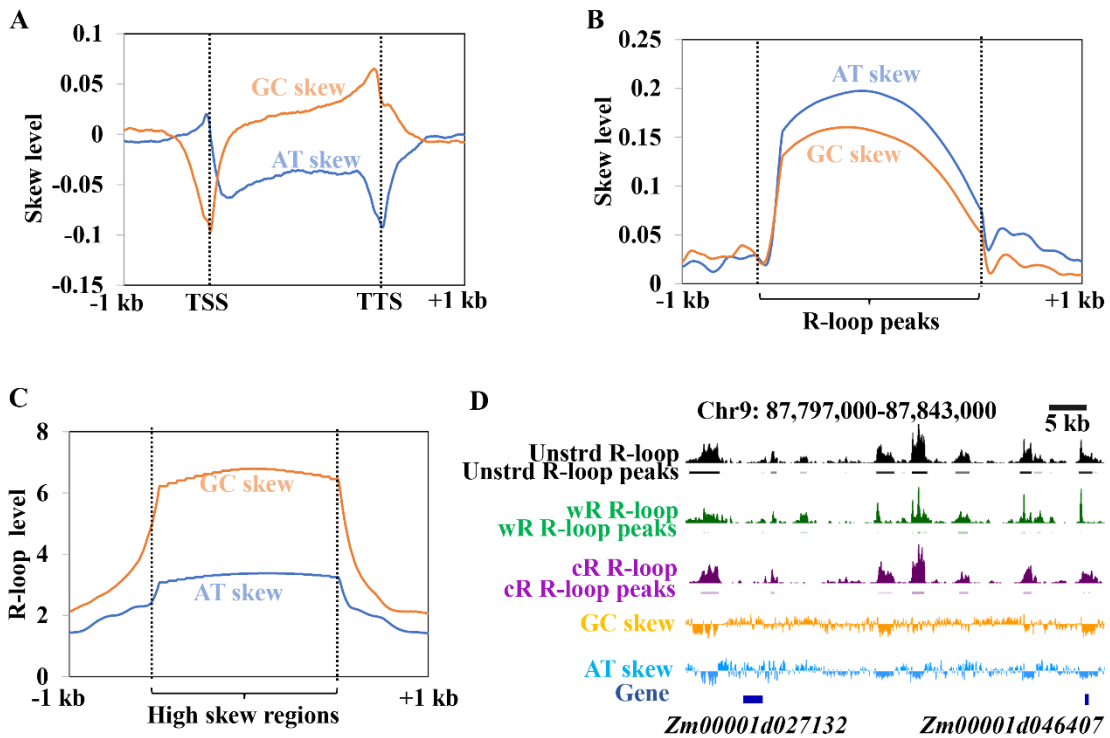

**Supplemental\_Fig\_S4. R-loops are enriched in both GC and AT skew regions.**

(A) Metaplot of GC (dark orange) and AT (cornflower blue) skew centered on non-TE genes. (B) Metaplot of GC (cornflower blue) and AT (dark orange) skew centered on all wR-loop and cR-loop peaks, mean of skew value in wR-loop peak, and reciprocal of skew value in cR-loop peak. (C) Metaplot of R-loop levels centered on high skewed GC and AT regions, 95% mean. (D) Snapshot of genomic regions containing different types of GC or AT skew and R-loops.
