# Supplementary material for: Genome-wide mapping reveals R-loops associated with centromeric repeats in maize
Source: PubMed Central journal article supplement — Genome Res. 2021 Aug;31(8):1409–18. doi: 10.1101/gr.275270.121 (PMC8327920; doi:10.1101/gr.275270.121), 2021-08
Supplement: supp_gr.275270.121_Supplemental_Fig_S5.pdf [file supp_gr.275270.121_Supplemental_Fig_S5.pdf]

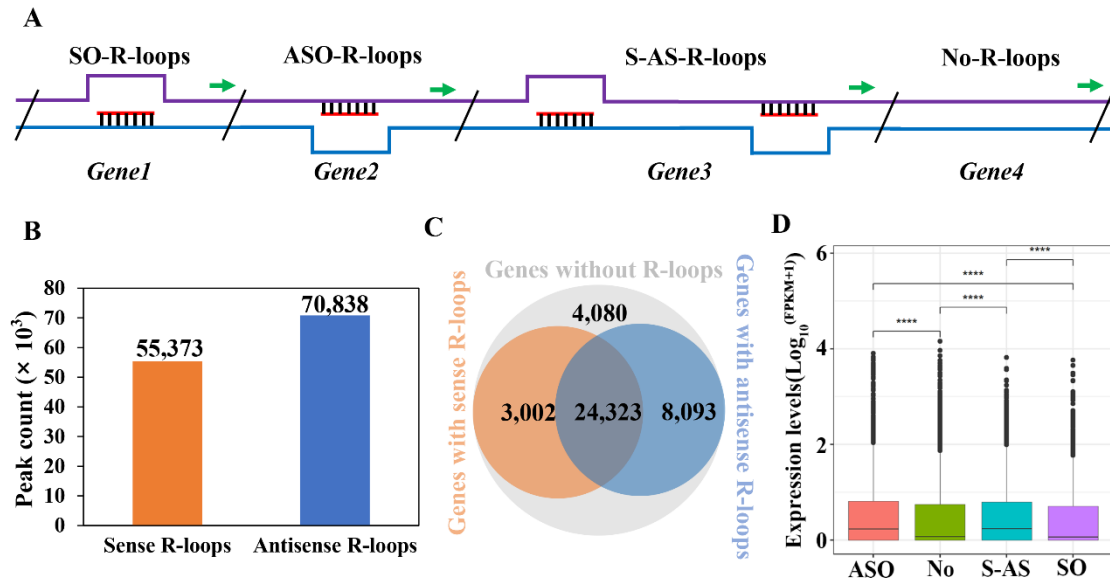

### Supplemental\_Fig\_S5. Statistics of the sense and antisense R-loops.

(A) Diagram of SO-R-loops, ASO-R-loops, S-AS-R-loops and No-R-loops. The non-TE genes were classified into four categories: (1) genes with sense only R-loops (SO-R-loops), (2) genes with antisense only R-loops (ASO-R-loops), (3) genes with both sense and antisense R-loops (S/AS-R-loops), and (4) genes without R-loops (No-R-loops). (B) Counts of sense (left, dark orange) and antisense (right, cornflower blue) R-loop peaks. (C) A Venn diagram depicting the numbers of genes without R-loops (grey), with sense (dark orange) and antisense (cornflower blue) R-loops. (D) Comparisons of the expression levels of non-TE genes between without R-loops, SO-R-loops, ASO-R-loops and S-AS-R-loops.
