# Supplementary material for: Genome-wide mapping reveals R-loops associated with centromeric repeats in maize
Source: PubMed Central journal article supplement — Genome Res. 2021 Aug;31(8):1409–18. doi: 10.1101/gr.275270.121 (PMC8327920; doi:10.1101/gr.275270.121), 2021-08
Supplement: supp_gr.275270.121_Supplemental_Fig_S6.pdf [file supp_gr.275270.121_Supplemental_Fig_S6.pdf]

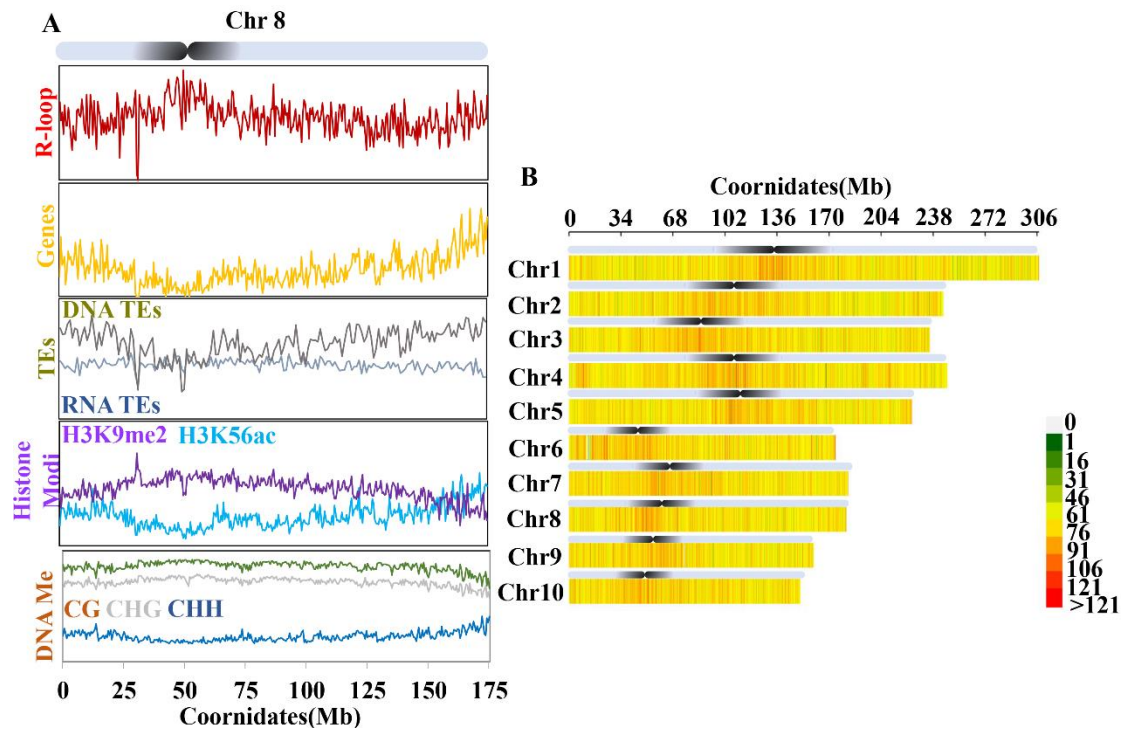

**Supplemental\_Fig\_S6. Maps of R-loops on maize chromosomes.**

(A) Map of R-loop peaks on Chromosome 8. Diagram of the Chromosome 8 with the pericentromeres shaded in black (top). The x axis represented positions on Chromosome 8. The y axis represented numbers of R-loop peaks. Shown below were patterns of genes expressed in leaf (yellow, genes/1Mb), TEs (DNA-TE/1Mb, dark yellow; RNA-TEs/1Mb, dark blue), histone modification (H3K9me2 (purple,  $\log_2(\text{ChIP}/\text{input})$ ), H3K56ac (light blue,  $\log_2(\text{ChIP}/\text{input})$ ), DNA methylation (proportion methylated in CG (orange), CHG (grayish white) and CHH (dark blue) contexts/500 kb). (B) Manhattan plot for R-loop peaks. The x axis showed the chromosomal position. Diagram of the Chromosome 1-10 with the pericentromeres shaded in black (top).
