# Supplementary material for: Genome-wide mapping reveals R-loops associated with centromeric repeats in maize
Source: PubMed Central journal article supplement — Genome Res. 2021 Aug;31(8):1409–18. doi: 10.1101/gr.275270.121 (PMC8327920; doi:10.1101/gr.275270.121), 2021-08
Supplement: supp_gr.275270.121_Supplemental_Fig_S7.pdf [file supp_gr.275270.121_Supplemental_Fig_S7.pdf]

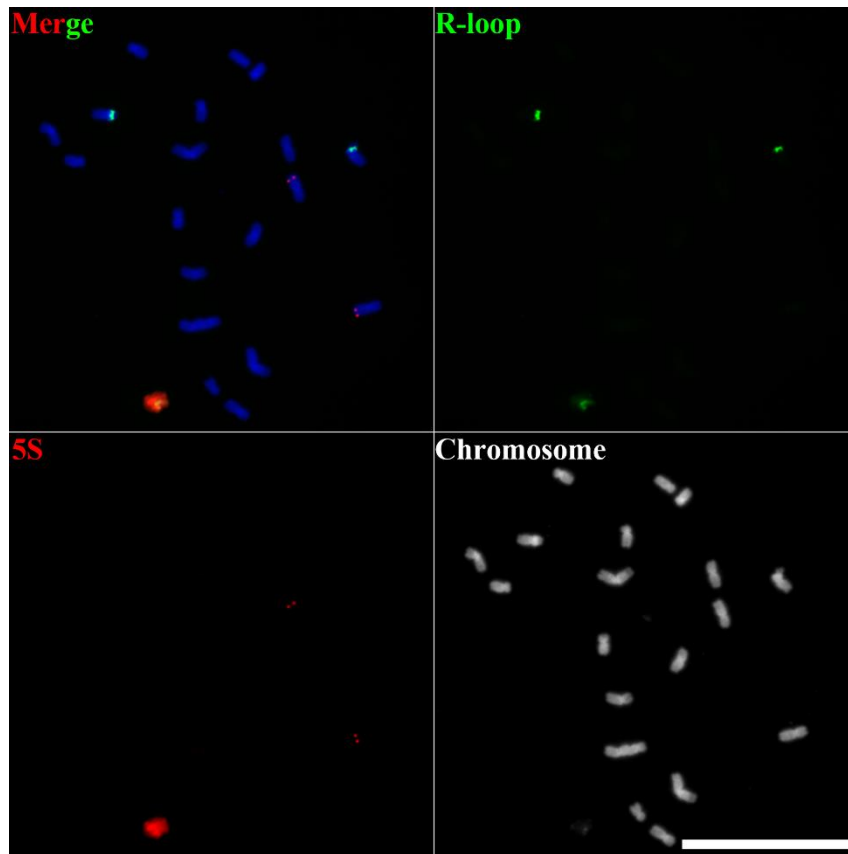

**Supplemental\_Fig\_S7. R-loops were not colocalized to 5S loci on spread chromosomes.**

R-loops (green), 5S (red), Bar = 10  $\mu\text{m}$ .
