# Supplementary material for: Genome-wide mapping reveals R-loops associated with centromeric repeats in maize
Source: PubMed Central journal article supplement — Genome Res. 2021 Aug;31(8):1409–18. doi: 10.1101/gr.275270.121 (PMC8327920; doi:10.1101/gr.275270.121), 2021-08
Supplement: supp_gr.275270.121_Supplemental_Fig_S8.pdf [file supp_gr.275270.121_Supplemental_Fig_S8.pdf]

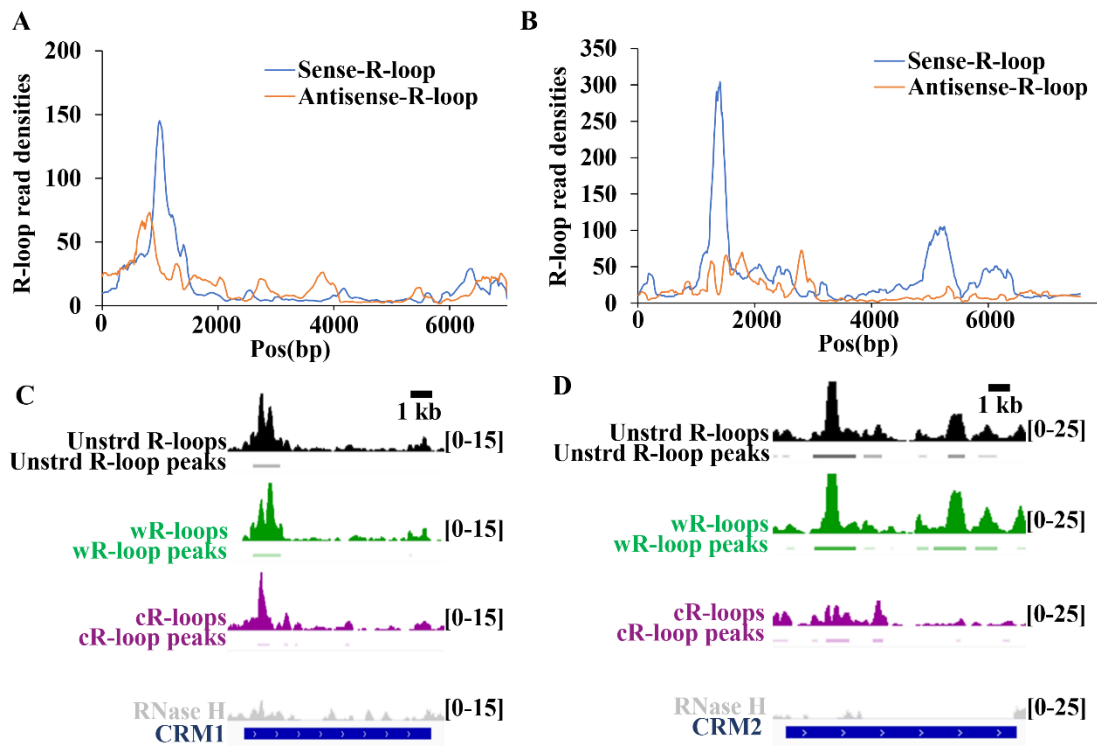

**Supplemental\_Fig\_S8. Distribution of sense and antisense R-loops on CRM1 and CRM2.**

(A) and (B) Metaplots of sense (cornflower blue) and antisense (orange) R-loop peaks centered on CRM1(A) and CRM2 (B). The x axis showed the entire CRM1 (A) and CRM2 (B) locus. (C) and (D) The snapshots of IGV spanning the entire CRM1 (C) and CRM2 (D).
