# Supplementary material for: Genome-wide mapping reveals R-loops associated with centromeric repeats in maize
Source: PubMed Central journal article supplement — Genome Res. 2021 Aug;31(8):1409–18. doi: 10.1101/gr.275270.121 (PMC8327920; doi:10.1101/gr.275270.121), 2021-08
Supplement: supp_gr.275270.121_Supplemental_Fig_S9.pdf [file supp_gr.275270.121_Supplemental_Fig_S9.pdf]

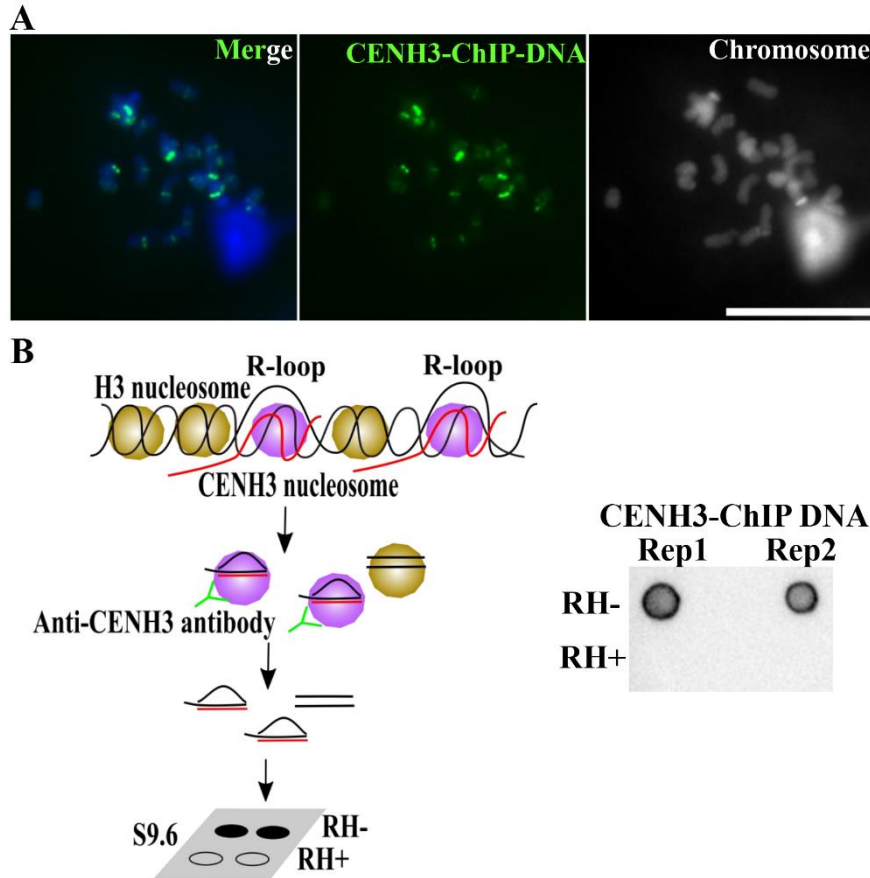

**Supplemental\_Fig\_S9. Confirmation of R-loops in maize centromere by CENH3-ChIP+S9.6 dot blot.**

(A) About 20 ng of CENH3-ChIP DNA was labeled as a FISH probe. Strong signals were detected in centromeres, indicating a well-performed CENH3-ChIP. (B) Diagram of the CENH3-ChIP+S9.6 dot blot and two replicates were conducted.
