# Supplementary material for: Genome-wide mapping reveals R-loops associated with centromeric repeats in maize
Source: PubMed Central journal article supplement — Genome Res. 2021 Aug;31(8):1409–18. doi: 10.1101/gr.275270.121 (PMC8327920; doi:10.1101/gr.275270.121), 2021-08
Supplement: supp_gr.275270.121_Supplemental_Fig_S10.pdf [file supp_gr.275270.121_Supplemental_Fig_S10.pdf]

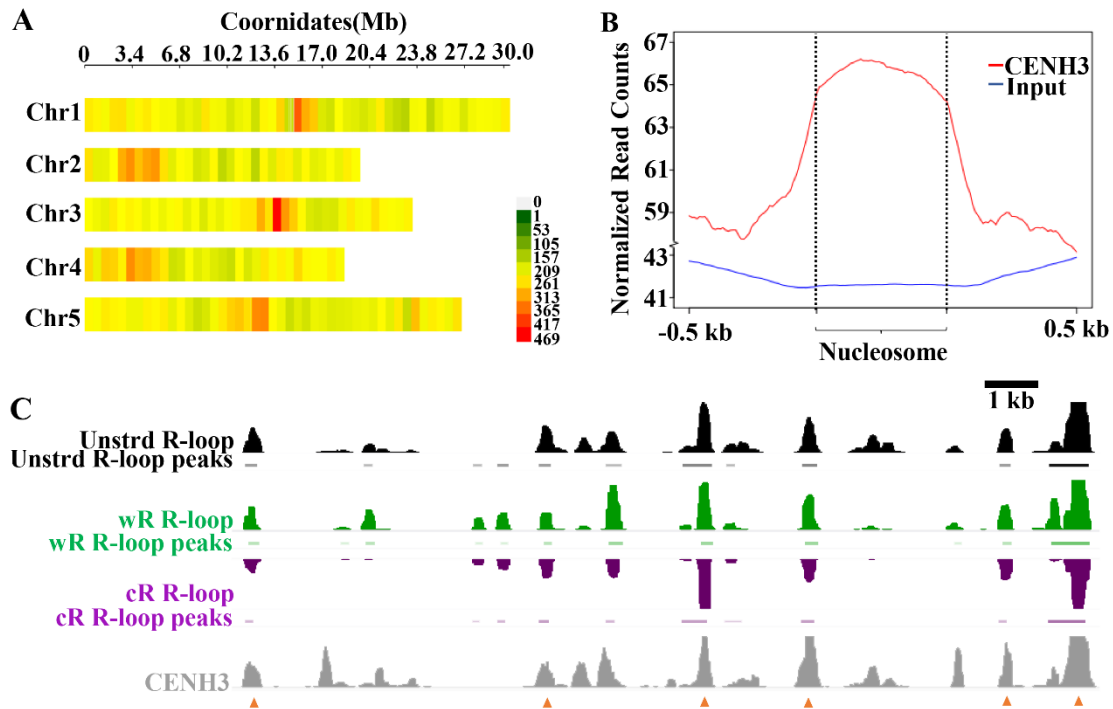

**Supplemental Fig S10. CENH3 binding regions are favorable for R-loop formation in *Arabidopsis*.**

(A) Manhattan plot for R-loop peaks in *Arabidopsis*. The x axis showed the chromosomal position. Diagram of Chromosomes 1-5 with the pericentromeres shaded in black (top). (B) Metaplots of R-loop peaks along the CENH3 and input nucleosome and the up- and downstream regions. (C) A representative region showing CENH3-ChIP and R-loop data. Line 1, unstranded (unstrd) R-loops signal, normalized to the genome-wide mean; line 2, unstrd R-loop peaks; line 3, normalized wR-loops signal (green); line 4, wR-loop peaks; line 5, normalized cR-loop signal (purple); line 6, cR-loops peaks; line 7, CENH3 ChIP-seq reads. The brown arrowhead indicated the colocalization regions of CENH3 nucleosomes and R-loops.
