# Supplementary material for: Genome-wide mapping reveals R-loops associated with centromeric repeats in maize
Source: PubMed Central journal article supplement — Genome Res. 2021 Aug;31(8):1409–18. doi: 10.1101/gr.275270.121 (PMC8327920; doi:10.1101/gr.275270.121), 2021-08
Supplement: supp_gr.275270.121_Supplemental_Table_S1.pdf [file supp_gr.275270.121_Supplemental_Table_S1.pdf]

Supplemental Table S1. Summary of different TE superfamilies containing R-loops.

| TE Class                                     | Code | Number of TE-R-loops | % total number of TE-R-loops | % total length of TEs | Enrichment |
|----------------------------------------------|------|----------------------|------------------------------|-----------------------|------------|
| <b><i>Class I (retroelements)</i></b>        |      |                      |                              |                       |            |
| <i>SINE/tRNA</i>                             | RST  | 104                  | 0.02%                        | 0.02%                 | 1          |
| <i>LINE/L1</i>                               | RIL  | 832                  | 0.16%                        | 0.15%                 | 1.06       |
| <i>LTR/Copia</i>                             | RLC  | 125,682              | 24.49%                       | 26.87%                | 0.91       |
| <i>LTR/Gypsy</i>                             | RLG  | 269,359              | 52.49%                       | 51.90%                | 1.01       |
| <i>uncharacteried Copia or Gypsy</i>         | RLX  | 62,830               | 12.24%                       | 10.82%                | 1.13       |
| Total                                        |      | 458,807              | 89.40%                       | 89.76%                | 0.99       |
| <b><i>Class II (DNA transposons)</i></b>     |      |                      |                              |                       |            |
| <b><i>Class II-Subclass 1</i></b>            |      |                      |                              |                       |            |
| <i>Tc1-Mariner</i>                           | DTT  | 6,687                | 1.30%                        | 1.54%                 | 0.84       |
| <i>hAT</i>                                   | DTA  | 1,386                | 0.27%                        | 0.27%                 | 1          |
| <i>Mutator</i>                               | DTM  | 201                  | 0.04%                        | 0.04%                 | 1          |
| <i>PIF-Harbinger</i>                         | DTH  | 4,607                | 0.90%                        | 1.42%                 | 0.63       |
| <i>CACTA</i>                                 | DTC  | 5,499                | 1.07%                        | 0.61%                 | 1.75       |
| <i>uncharacteried subclass I transposons</i> | DTX  | 3,089                | 0.60%                        | 1.18%                 | 0.51       |
| Total                                        |      | 21,469               | 4.20%                        | 5.06%                 | 0.83       |
| <b><i>Class II-Subclass 2</i></b>            |      |                      |                              |                       |            |
| <i>Helitron</i>                              | DHH  | 32,830               | 6.40%                        | 5.19%                 | 1.23       |
| Total                                        |      | 513,106              | 100%                         | 100%                  |            |
