# Supplementary material for: Genome-wide mapping reveals R-loops associated with centromeric repeats in maize
Source: PubMed Central journal article supplement — Genome Res. 2021 Aug;31(8):1409–18. doi: 10.1101/gr.275270.121 (PMC8327920; doi:10.1101/gr.275270.121), 2021-08
Supplement: supp_gr.275270.121_Supplemental_Table_S2.pdf [file supp_gr.275270.121_Supplemental_Table_S2.pdf]

**Supplemental Table S2. Summary of R-loop peaks in maize centromeres.**

| <b>Cen</b> | <b>Length of CENH3-enriched subdomains (kb)</b> | <b>Length of CENH3-depleted subdomains (kb)</b> | <b>Number of total centromere R-loop peaks</b> | <b>Number of CENH3-enriched subdomains R-loop peaks</b> | <b>Number of CENH3-depleted subdomains R-loop peaks</b> | <b>Ratio</b> |
|------------|-------------------------------------------------|-------------------------------------------------|------------------------------------------------|---------------------------------------------------------|---------------------------------------------------------|--------------|
| Cen1       | 22                                              | 94                                              | 72                                             | 32                                                      | 40                                                      | 3.42         |
| Cen2       | 857                                             | 526                                             | 650                                            | 442                                                     | 208                                                     | 1.30         |
| Cen3       | 288                                             | 234                                             | 275                                            | 182                                                     | 93                                                      | 1.59         |
| Cen4       | 531                                             | 426                                             | 488                                            | 321                                                     | 167                                                     | 1.54         |
| Cen5       | 1192                                            | 593                                             | 886                                            | 654                                                     | 232                                                     | 1.40         |
| Cen6       | 70                                              | 85                                              | 71                                             | 51                                                      | 20                                                      | 3.10         |
| Cen7       | 10                                              | 33                                              | 33                                             | 22                                                      | 11                                                      | 6.60         |
| Cen8       | 904                                             | 455                                             | 694                                            | 488                                                     | 206                                                     | 1.19         |
| Cen9       | 1228                                            | 427                                             | 711                                            | 606                                                     | 105                                                     | 2.01         |
| Cen10      | 926                                             | 258                                             | 542                                            | 467                                                     | 75                                                      | 1.73         |
| Total      | 6028                                            | 3131                                            | 4422                                           | 3265                                                    | 1157                                                    | 1.47         |
