# Supplementary material for: Genome-wide mapping reveals R-loops associated with centromeric repeats in maize
Source: PubMed Central journal article supplement — Genome Res. 2021 Aug;31(8):1409–18. doi: 10.1101/gr.275270.121 (PMC8327920; doi:10.1101/gr.275270.121), 2021-08
Supplement: supp_gr.275270.121_Supplemental_Table_S3.pdf [file supp_gr.275270.121_Supplemental_Table_S3.pdf]

**Supplemental Table S3. List of primer sequences used in this study.**

| <b>Primer</b>         | <b>Sequence (5' to 3')</b> | <b>Assay</b>         |
|-----------------------|----------------------------|----------------------|
| <b>P1-F</b>           | GGCTTCCAAAACAGACAAGGA      | DRIP-qPCR            |
| <b>P1-R</b>           | CAAGCGCCCCTTCTCATTG        | DRIP-qPCR            |
| <b>P2-F</b>           | AGACCATCCAACCAAGATAAGGA    | DRIP-qPCR            |
| <b>P2-R</b>           | TACATGCTTCGGATTGTCGC       | DRIP-qPCR            |
| <b>P3-F</b>           | CTCGCAACTCTCAAACCTGGG      | DRIP-qPCR            |
| <b>P3-R</b>           | CTTCTTTACCGCGTGTAGGC       | DRIP-qPCR            |
| <b>P4-F</b>           | TCCGGTTACAAGACGGTAGG       | DRIP-qPCR            |
| <b>P4-R</b>           | ATGGGAAACCAACGAAACAA       | DRIP-qPCR            |
| <b>P5-F</b>           | GTCAGCTTGGGCTAGATTGC       | DRIP-qPCR            |
| <b>P5-R</b>           | AAAACCATACAACGGGGTCA       | DRIP-qPCR            |
| <b>P6-F</b>           | ACAGGGCAGAGAGGAGTTGA       | DRIP-qPCR            |
| <b>P6-R</b>           | ACGCTGCTTTGCTTCTTCTC       | DRIP-qPCR            |
| <b>P7-F</b>           | CTAGGGTGTGCCTTGGTGTT       | DRIP-qPCR            |
| <b>P7-R</b>           | ATGGCTACGACCGATTGAAC       | DRIP-qPCR            |
| <b>N1-F</b>           | AAAGGGTGCAGCAGTTTGAG       | DRIP-qPCR            |
| <b>N1-R</b>           | CAGCAACAACAGGTCCAGTC       | DRIP-qPCR            |
| <b>CRM1-F</b>         | GAAGGCCCGGAAGAATAGAC       | AFM                  |
| <b>CRM1-R</b>         | AGCACGACAATCTACGCACA       | AFM                  |
| <b>CRM2-F</b>         | TGATGAAGACATCCCACTAC       | AFM                  |
| <b>CRM2-R</b>         | AACAGGAGGCAAAGAATGCTG      | AFM                  |
| <b>CRM1-control-F</b> | AAGGGTATGCTTCGTTGTGG       | AFM                  |
| <b>CRM1-control-R</b> | CAAACCTATGAAGGCCCGTA       | AFM                  |
| <b>P1-CRM1-F</b>      | TTTGATCACGCCACAAACCG       | CENH3-ChIP-S9.6-qPCR |
| <b>P1-CRM1-R</b>      | AATCAAGGAAACGGCCGT         | CENH3-ChIP-S9.6-qPCR |
| <b>P2-CRM2-F</b>      | GGGGCTGAATCTCTAAATCTGT     | CENH3-ChIP-S9.6-qPCR |
| <b>P2-CRM2-R</b>      | AAACCAGGCTAGAGACGTGA       | CENH3-ChIP-S9.6-qPCR |
| <b>P3-CENH3-F</b>     | TAGTCTCTGATCGCGATGCT       | CENH3-ChIP-S9.6-qPCR |
| <b>P3-CENH3-R</b>     | TGAGGGTGACAAGTAGTGCT       | CENH3-ChIP-S9.6-qPCR |
| <b>P4-NO-F</b>        | ATCAGCCTTCCCAACCTTGA       | CENH3-ChIP-S9.6-qPCR |
| <b>P4-NO-R</b>        | GTACCCCGACCATGTGTGTA       | CENH3-ChIP-S9.6-qPCR |
